# Supplementary material for: Photochemical synthesis of CeO2 nanoscale particles using sodium azide as a photoactive material: effects of the annealing temperature and polyvinylpyrrolidone addition
Source: Royal Society of Chemistry journal article supplement (doi:10.1039/c6ra22037a), 2016-01-01
Supplement: c6ra22037a1.pdf [file c6ra22037a1.pdf]

## Supporting information

### Photochemical synthesis of CeO<sub>2</sub> nanoscale particles using sodium azide as a photoactive material: Effects of the annealing temperature and polyvinylpyrrolidone addition

Eva Raudonyte-Svirbutaviciene<sup>a</sup>, Lina Mikoliunaite<sup>b</sup>, Audrius Drabavicius<sup>c</sup>,  
Remigijus Juskenas<sup>c</sup>, Simas Sakirzanovas<sup>d</sup>, Thomas Jüstel<sup>e,\*</sup>, Arturas Katelnikovas<sup>a,\*</sup>

<sup>a</sup> Department of Analytical and Environmental Chemistry, Vilnius University, Naugarduko 24, LT-03225 Vilnius, Lithuania

<sup>b</sup> Department of Physical Chemistry, Vilnius University, Naugarduko 24, LT-03225 Vilnius, Lithuania

<sup>c</sup> Department of Characterization of Materials Structure, Institute of Chemistry, Center for Physical Sciences and Technology, Sauletekio av. 3, LT-10257 Vilnius, Lithuania

<sup>d</sup> Department of Applied Chemistry, Vilnius University, Naugarduko 24, LT-03225 Vilnius, Lithuania

<sup>e</sup> Department of Chemical Engineering, Münster University of Applied Sciences, Stegerwaldstr. 39, D-48565 Steinfurt, Germany

\* Corresponding authors: Tel.: +49 2551962205; fax: +49 2551962502; E-mail: tj@fh-muenster.de (T. Jüstel)  
Tel: +370 697 23123; E-mail: arturas.katelnikovas@chf.vu.lt (A. Katelnikovas)

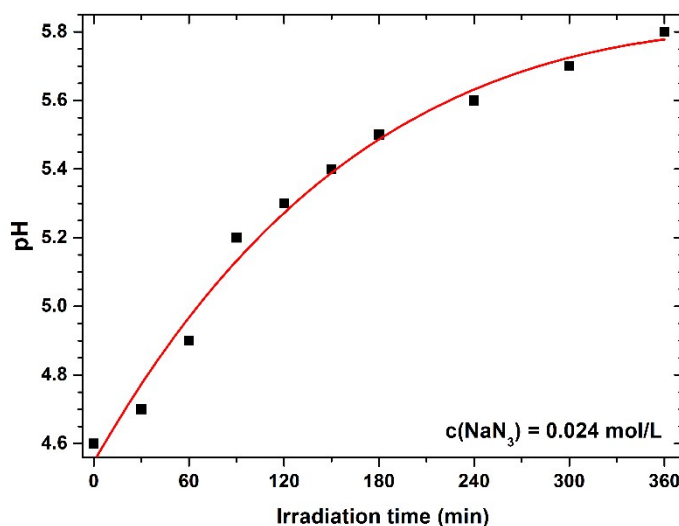

**Figure S1.** pH as a function of VUV irradiation time of 0.024 mol/L NaN<sub>3</sub> solution.

The initial pH of 0.024 mol/L NaN<sub>3</sub> solution was 9.5. This solution was acidified with acetic acid to pH = 4.6 and only then the irradiation with VUV was started. The acidification was performed in order to better observe the pH change.
